# Supplementary material for: Controlled synthesis and luminescent properties of uniform SrMoO4 hollow microstructures and application as drug carrier
Source: Royal Society of Chemistry journal article supplement (doi:10.1039/c3ra22615h), 2013-01-01
Supplement: c3ra22615h.pdf [file c3ra22615h.pdf]

## Supporting Information

### **Controlled synthesis and luminescent properties of uniform SrMoO<sub>4</sub> hollow microstructures and application as drug carrier**

**Yan Wang,<sup>a</sup> Shili Gai,<sup>a</sup> Chunxia Li,<sup>b</sup> Xiao Zhang,<sup>a</sup> Na Niu,<sup>a</sup> Fei He,<sup>a</sup> Milin Zhang,<sup>a</sup> and Piaoping Yang,<sup>a,\*</sup>**

<sup>a</sup> *Key Laboratory of Superlight Materials and Surface Technology, Ministry of Education, Harbin Engineering University, Harbin 150001, P. R. China*

<sup>b</sup> *State Key Laboratory of Rare Earth Resource Utilization, Changchun Institute of Applied Chemistry, Chinese Academy of Sciences, Changchun 130021, P. R. China*

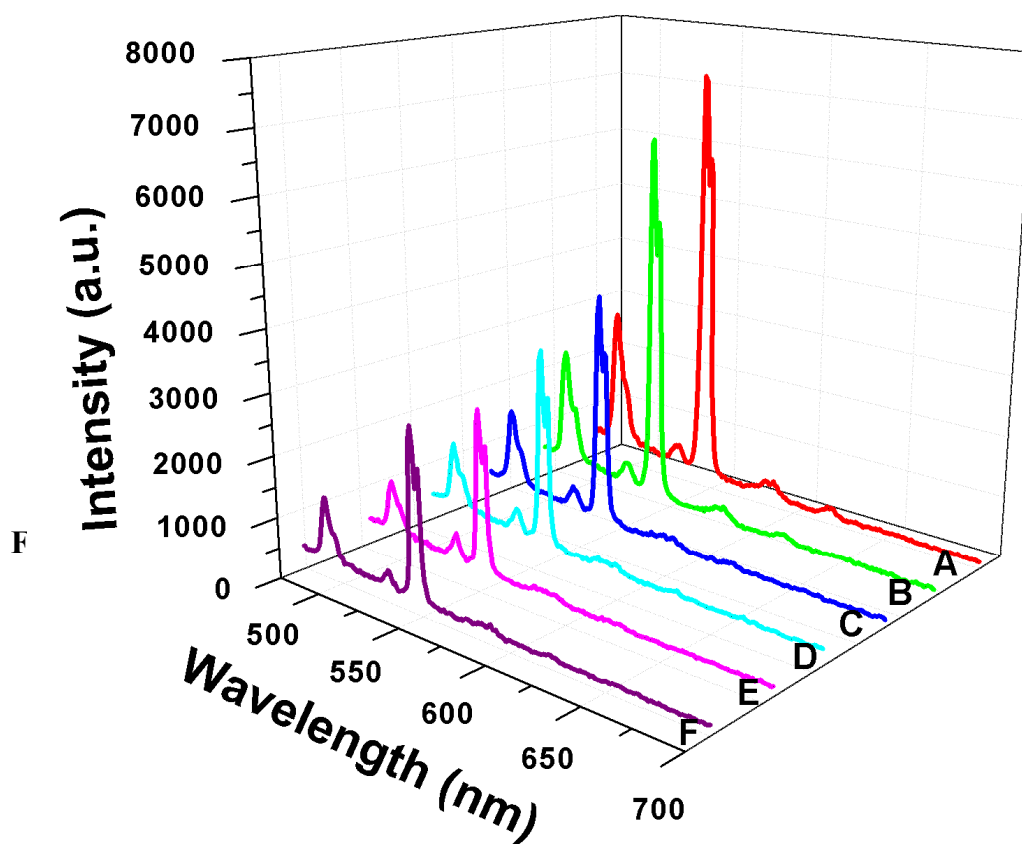

**Fig. S1** Emission spectra of SrMoO<sub>4</sub>:Tb<sup>3+</sup> samples prepared different PSS concentrations while the reactants concentration in the mixed solvent was fixed at 20 mM. [PSS]: 0 g/L (A), 0.05 g/L (B), 0.1 g/L (C), 1.5 g/L (D), 3 g/L (E), and 4 g/L (F).

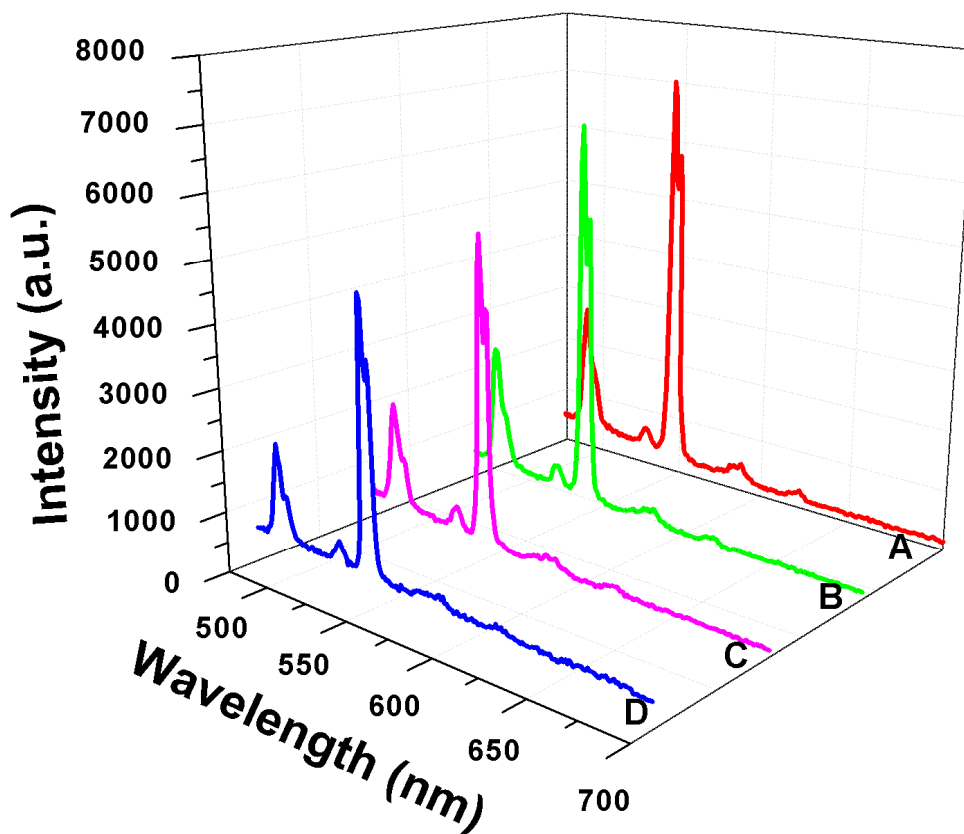

**Fig. S2** Emission spectra of SrMoO<sub>4</sub>:Tb<sup>3+</sup> samples prepared different reactants concentration of 60 mM (A), 20 mM (B), 15 mM (C), and 10 mM (D). All of the samples were prepared with the PSS concentration of 0.1 g/L at 80 °C for 12 h (pH =

3).

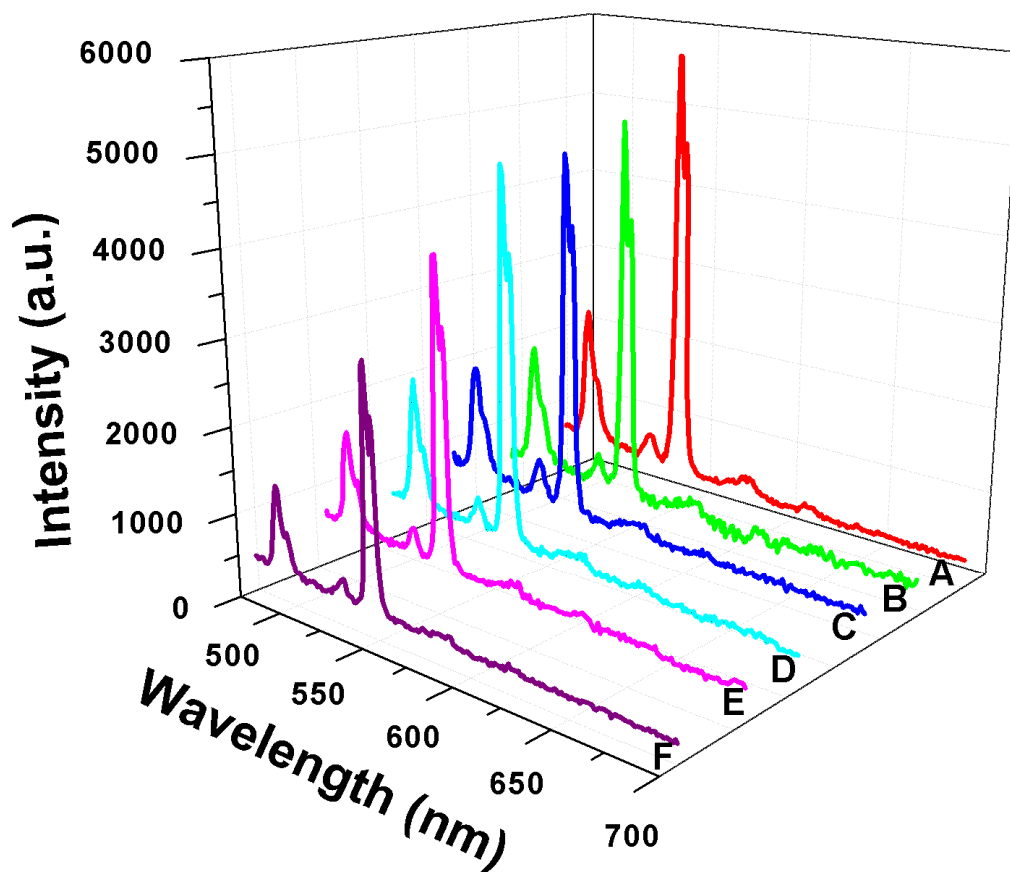

**Fig. S3** Emission spectra of SrMoO<sub>4</sub>:Tb<sup>3+</sup> samples prepared with different pH values of 6.3 (A), 5 (B), 4 (C), 3 (D), 2.5 (E) and 2 (F). All of the samples were obtained with the PSS concentration of 0.1 g/L at 80 °C while the reactants concentration in the mixed solvent was fixed at 20 mM.

**Table S1** Amount of sulfonic acid group neutralized by  $\text{Sr}^{2+}$  ions at different PSS concentrations

| PSS(g/L)                            | 0 | 0.05  | 0.1   | 1.5   | 3     | 4     |
|-------------------------------------|---|-------|-------|-------|-------|-------|
| Neutralized $\text{SO}^{3-}$ (mmol) | 0 | 0.048 | 0.097 | 0.146 | 0.290 | 0.388 |
